# Supplementary material
Source: PubMed Central journal article supplement (PMC4346205)
Supplement: NIHMS660494-supplement-supplement_1.pdf [file NIHMS660494-supplement-supplement_1.pdf]

Supplementary Table 1. Rotated Component Matrix: Promax Rotation From Social Behavior Impairment Principal Components Analysis

| <b>Subscale</b>          | <b>Factor 1</b> | <b>Factor 2</b> | <b>Factor 3</b> | <b>Factor 4</b> |
|--------------------------|-----------------|-----------------|-----------------|-----------------|
| Griffith Empathy Scale   | .90             | -.04            | -.31            | -.10            |
| CCC social relations     | .85             | -.04            | .03             | .20             |
| CCC nonverbal            | .79             | .09             | .03             | .08             |
| CCC context              | .63             | -.04            | .39             | -.10            |
| CCC coherence            | .47             | .12             | .33             | .09             |
| SRS social cognition     | .37             | .35             | .16             | .26             |
| CCC interests            | -.10            | .88             | .07             | .00             |
| SRS mannerisms           | -.08            | .83             | -.14            | .32             |
| CCC initiation           | .39             | .63             | .08             | .28             |
| SRS social awareness     | .49             | .54             | -.09            | .00             |
| CCC syntax               | -.13            | .08             | .88             | .03             |
| CCC speech               | -.24            | .07             | .73             | .25             |
| CCC semantics            | .39             | -.30            | .72             | .00             |
| CCC scripted speech      | .10             | .44             | .54             | .23             |
| SRS social motivation    | .02             | -.015           | .07             | .91             |
| SRS social communication | .45             | .31             | .02             | .46             |

Note: CCC = Children's Communication Checklist; SRS = Social Responsiveness Scale.

Supplemental Table 2. Raw Score Changes on Scales Included in Composites

| Characteristic                                | NETT<br>(n=35)    |                   | Facilitated Play (control)<br>(n=34) |                   |
|-----------------------------------------------|-------------------|-------------------|--------------------------------------|-------------------|
|                                               | Baseline          | Endpoint          | Baseline                             | Endpoint          |
|                                               | M (SD)            | M (SD)            | M (SD)                               | M (SD)            |
|                                               | <i>Range</i>      | <i>Range</i>      | <i>Range</i>                         | <i>Range</i>      |
| <b>Social cognition composite</b>             | .15 (.84)         | .27 (.92)         | -.14 (.78)                           | -.02 (.76)        |
|                                               | <i>-1.44-1.39</i> | <i>-1.93-1.67</i> | <i>-1.6- 1.25</i>                    | <i>-1.41-1.61</i> |
| <b>DANVA</b>                                  | 84.53 (11.89)     | 87.58 (13.51)     | 80.08 (12.74)                        | 81.97 (11.88)     |
|                                               | <i>53-100</i>     | <i>52-107</i>     | <i>49-96</i>                         | <i>63-103</i>     |
| <b>Children's Reading Mind in Eyes</b>        | 17.03 (3.88)      | 17.58 (4.44)      | 16.08 (4.6)                          | 16.03 (4.58)      |
| <b>Test</b>                                   | <i>10-25</i>      | <i>6-26</i>       | <i>7-25</i>                          | <i>5-25</i>       |
| <b>Strange Stories Mentalizing</b>            | 6.00 (3.08)       | 6.06 (3.05)       | 5.17 (2.76)                          | 5.76 (2.37)       |
|                                               | <i>0-11</i>       | <i>0-12</i>       | <i>0-9</i>                           | <i>0-10</i>       |
| <b>Social behavior composite <sup>a</sup></b> | -.04 (1.00)       | -.34 (.64)        | .05 (.70)                            | -.01 (.73)        |
|                                               | <i>-1.86-2.28</i> | <i>-2.05-.71</i>  | <i>-1.06-1.5</i>                     | <i>-1.2-1.63</i>  |
| <b>Griffith Empathy Scale <sup>b</sup></b>    | 129.67 (25.81)    | 132.72 (24.31)    | 123.62 (19.28)                       | 123.96 (20.55)    |
|                                               | <i>65-180</i>     | <i>72-180</i>     | <i>84-155</i>                        | <i>97-185</i>     |
| <b>Children's Communication</b>               | 9.34 (4.55)       | 7.69 (3.06)       | 9.58 (3.02)                          | 9.22 (3.58)       |
| <b>Checklist – social relations</b>           | <i>0-19</i>       | <i>2-14</i>       | <i>4-16</i>                          | <i>2-18</i>       |
| <b>Children's Communication</b>               | 10.03 (4.78)      | 8.88 (3.84)       | 10.07(3.54)                          | 9.96 (3.46)       |
| <b>Checklist nonverbal</b>                    | <i>1-18</i>       | <i>0-15</i>       | <i>5-17</i>                          | <i>5-16</i>       |

Note: Social Responsiveness Scale (SRS) was included in the principal components analysis (PCA) but not included in the composite because of low factor loadings on social behavior impairment factor. DANVA = Diagnostic

Analysis of Nonverbal Accuracy; NETT = Nonverbal communication, Emotion recognition, and Theory of mind Training.

<sup>a</sup> Lower scores reflect less impairment on social behavior.

<sup>b</sup> Griffith Empathy Scale, which was rescaled for the PCA to correspond with direction Children's Communication Checklist and SRS.
